# Supplementary material for: Human Cell Line Panel With Human/Mouse Artificial Chromosomes for Functional Analyses of Desired Genes
Source: Research Square preprint supplement (doi:10.21203/rs.3.rs-699365/v1), 2021-07-21
Supplement: Supplementary file 1 [file 8f7e3d6a791599eb5b213a18.pdf]

## Supplemental Figure 4

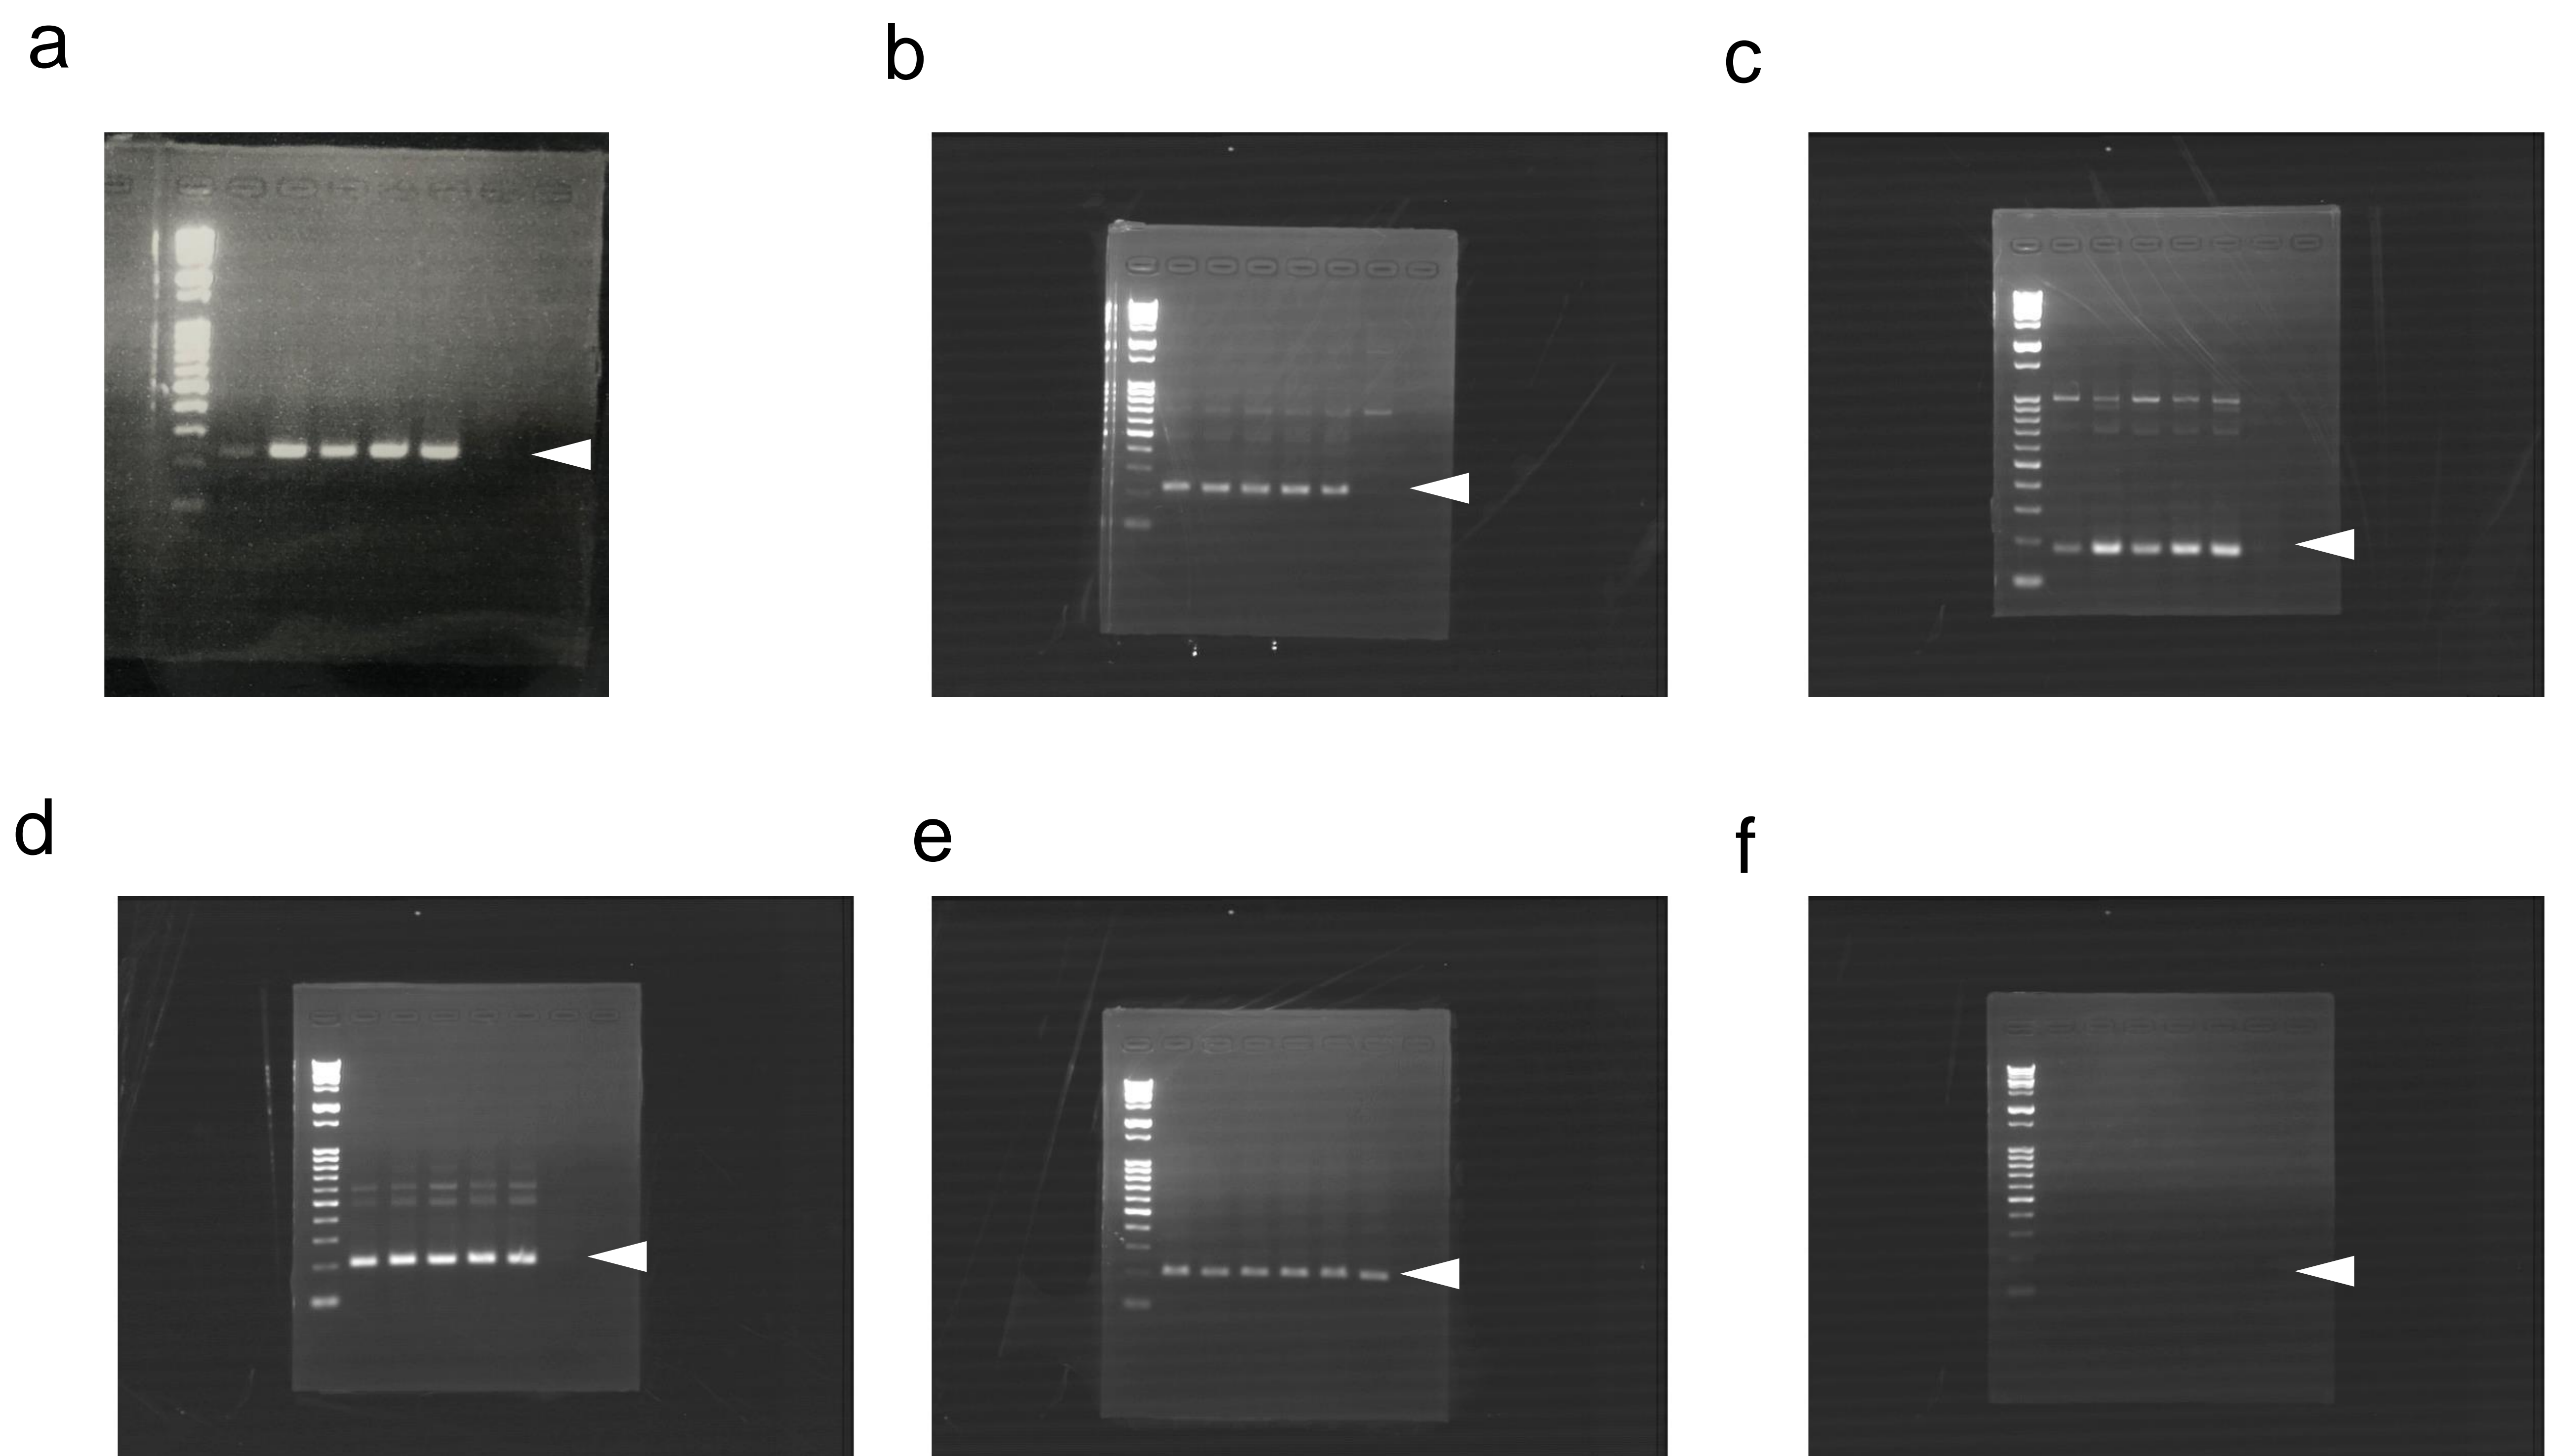

### **Supplementary Figure. S4 RT-PCR analysis of various MSC markers in hiMSCs that contained 21HAC2.**

The original gel-image of the results of RT-PCR analyses. (a) CXCL1, (b) CD90, (c) IL-8, (d) CCL2, (e) GAPDH2 RT+ and (f) GAPDH2 RT-. For all gels, the samples were applied as follows; i.e., Lane 1: Gene Ladder Wide 2 (NIPPON GENE CO., LTD. Tokyo. Japan.), lane 2: hiMSC, lane 3: hiMSC6TGr #3, lane 4: hiMSC6TGr #6, lane 5: hiMSC 21HAC2 A03, lane 6: hiMSC 21HAC2 D11 and lane 7: HEK293T. The arrowheads shows the expected band of each analysis. For each experiment, the expected band was indicated by each arrowhead.
